# Supplementary material
Source: publisher figshare collection journal article supplement (https://gsajournals.figshare.com/ndownloader/files/24749939)
Supplement: Supplementary file 1 [file 24749939]

## Sheet: Local_Max_Allele_Frequency_noNA
Table S5 Allele frequency by line of each loci identified as a local maximum.
Chromosome	Position	P-value	C1_af	C2_af	C4_af	C5_af	HR3_af	HR6_af	HR7_af	HR8_af
1	32857454	0.000629313	0.65	1	0.8	0.5	0.0555556	0	0	0
1	38980641	0.000277894	1	0.9	0.75	1	0.222222	0	0	0.3
2	137385507	0.000572077	0	0	0	0	0.444444	0.95	0.85	1
2	43113504	0.000874743	0.9	1	1	1	0.555556	0.2	0	0
3	36412554	0.000737289	1	0.95	1	1	0.642857	0.05	0	0
3	51572438	2.25e-06	0	0	0	0	0.777778	1	1	1
3	51578481	4.86e-07	0	0	0	0	0.833333	1	1	1
3	51602962	4.57e-07	0	0	0	0	0.833333	1	1	1
4	155631409	6.61e-05	1	1	1	1	0.222222	0.35	0.35	0.45
4	57755684	0.00021332	1	1	0.625	1	0.222222	0.111111	0	0
4	87099655	0.000792521	0.65	0.75	0.8	0.95	0.388889	0	0	0
5	106626725	0.000498058	0	0	0.2	0.4	0.944444	0.833333	1	0.8125
5	107001580	0.000199066	0	0	0	0	0.888889	0.55	1	0.9
5	108438229	1.65e-09	1	1	1	1	0.0555556	0	0	0
5	108684256	8.27e-06	1	1	0.85	0.888889	0.0555556	0.2	0	0
5	119869347	3.16e-05	1	1	1	1	0	0	0.333333	0
5	119889728	0.000138963	1	1	1	1	0	0	0.4	0
5	29013151	0.000425298	0	0.2	0.3	0	0.777778	1	1	0.75
6	41590354	4.69e-06	0.95	0.9	0.75	1	0	0	0	0
6	41728325	4.69e-06	0.95	0.9	0.75	1	0	0	0	0
6	99628953	0.000169465	0	0	0.05	0	0.944444	0.6	1	1
7	29603841	0.000186546	0.5	0.3	0.35	0.55	1	1	1	1
8	9735164	0.000316616	0.85	0.7	0.8	1	0.111111	0	0	0.3
9	41827279	1.9e-07	0	0	0.05	0	0.888889	1	0.95	0.9
9	41884401	1.44e-07	1	1	1	1	0.111111	0	0.05	0.1
9	42007409	1.92e-07	1	1	1	1	0.111111	0	0.1	0.0555556
10	104398864	0.000250103	0.944444	1	1	0.95	0.5	0.15	0.15	0
10	104635007	0.000218818	1	1	1	0.8125	0.428571	0.25	0.15	0
10	105011563	0.000228619	1	1	1	0.9375	0.5	0.15	0.2	0
10	105415318	0.000129476	1	1	1	0.95	0.388889	0.25	0.3	0
10	105529701	3.73e-05	1	1	1	0.95	0.388889	0.25	0.3	0.45
10	20344682	0.00025252	1	1	0.8	0.8	0	0.35	0	0
10	49632581	0.000157091	0.833333	0.55	0.55	0.777778	0	0	0	0
10	75158242	0.000442279	0.8	0.95	0.95	1	0.333333	0	0	0.375
11	112513488	3.9e-05	0.85	0.6	0.65	0.7	0	0	0	0
11	112893934	4.16e-05	0.888889	0.65	0.65	0.65	0	0	0	0
11	18902624	0.000310837	0.35	0.5	0.55	0.35	0.833333	1	1	1
11	80090780	2.96e-05	0	0	0	0	0.944444	1	0.7	1
12	88919735	7.54e-05	0.75	0.777778	1	1	0	0.2	0	0.0555556
14	39477931	7.73e-05	0	0	0	0	0.611111	1	1	1
14	52072148	4.35e-05	0	0	0.05	0	1	1	0.666667	1
14	52082088	9.19e-05	1	1	1	1	0	0.277778	0.375	0.0555556
14	52088844	0.000203159	1	1	0.875	1	0	0	0.4	0
14	97643510	0.00030762	0.8	0.7	0.75	1	0.1875	0.25	0	0.222222
14	98303783	0.000532175	1	0.611111	1	1	0.166667	0.15	0	0.277778
14	98636110	0.000519794	1	0.611111	1	0.95	0.166667	0.2	0	0.277778
15	19273306	8.49e-05	0.2	0	0	0.35	0.944444	0.95	1	1
15	19302051	0.000134802	0.15	0	0.4	0.222222	0.875	1	1	1
15	19375736	8.53e-05	0.777778	0.9375	0.611111	0.65	0.0555556	0	0	0
15	19717520	8.96e-05	0.722222	0.7	0.5	0.65	0.0555556	0	0	0
15	71023429	8.74e-05	0	0.25	0.35	0.25	0.944444	0.9	1	1
15	71325309	0.000251873	0	0.277778	0.444444	0.25	1	0.9	1	1
16	14215165	7.25e-06	0	0	0	0	1	1	1	0.75
16	16235542	0.000740301	0.85	1	1	1	0	0.5	0	0.2
16	17203053	0.000859684	0.15	0	0	0	1	0.5	1	0.75
16	17221541	0.000824261	0.15	0	0	0	1	0.55	1	0.65
16	17805005	0.0007037	0.888889	1	1	1	0	0.5	0	0.25
16	32204490	6.29e-05	1	1	1	1	0.222222	0.15	0.3	0.45
16	32207328	5.06e-05	1	1	1	1	0.277778	0.1	0.25	0.4375
16	32209692	1.71e-05	0.95	1	1	1	0.166667	0.1	0.25	0.333333
16	33128268	7.05e-06	1	0.9	0.75	0.85	0	0	0	0
16	41543123	0.00033081	0.75	0.55	1	1	0	0	0	0
16	41718872	0.000285607	0.222222	0.444444	0	0	1	1	1	1
16	96795226	0.000486606	1	1	1	1	0.111111	0	0	0.5
17	16335640	0.000257836	0.95	0.55	0.8	1	0	0	0	0
17	18728507	8.2e-05	0.95	0.65	0.95	0.7	0	0	0	0
17	19029076	0.000109453	0.95	0.65	1	0.7	0	0	0	0
17	19092131	0.000121089	0.85	0.6	0.7	0.6	0	0.05	0	0
17	19130588	0.000118457	0.7	0.55	0.9	0.7	0	0	0	0
17	19233091	9.09e-05	0.65	0.5	0.7	0.6	0	0	0	0
17	19370469	7.54e-05	0.9	0.6	0.8	0.7	0	0	0	0
17	19623031	0.000113799	0.944444	0.65	1	0.7	0	0	0	0
17	19656799	0.000140063	0.95	0.6	1	0.75	0	0	0	0
17	20535286	9.89e-05	0.8	0.55	0.8	0.65	0	0	0	0
17	20593686	0.000138834	0.8	0.55	0.7	0.55	0	0	0	0
17	22261389	0.00012855	0.95	0.65	1	0.7	0	0	0	0
17	22383249	9.32e-05	0.75	0.55	0.7	0.55	0	0	0	0
17	65056324	0.000604038	0.55	0.65	0.8	0.4	0	0	0	0
17	65613890	0.000467036	0.6	0.8	0.7	0.4	0	0	0	0
17	87242893	0.000372418	0.944444	0.8	0.9	1	0.555556	0.35	0.35	0.3
17	88663502	0.000768355	0	0.05	0	0	0.444444	0.45	0.5	0.7
18	39094569	0.000110623	0.2	0.3	0	0	1	0.8	1	1
19	29945350	0.000677721	0	0	0	0	0.5	0.45	0.5	0.5
19	35458692	0.00095655	0.3	0.15	0.3	0	0.666667	0.75	1	1
